# Supplementary material for: Temperature sensitivity modulation through changing the vanadium concentration in a La2MgTiO6:V5+,Cr3+double perovskite optical thermometer
Source: Royal Society of Chemistry journal article supplement (doi:10.1039/d1dt00911g), 2021-01-01
Supplement: d1dt00911g1.pdf [file d1dt00911g1.pdf]

*Supplementary information for*

**Temperature sensitivity modulation through vanadium concentration in La<sub>2</sub>MgTiO<sub>6</sub>:  
V<sup>5+</sup>, Cr<sup>3+</sup> double perovskite optical thermometer**

**D. Stefańska<sup>\*1</sup>, B. Bondzior<sup>1</sup>, T. H. Q. Vu<sup>1</sup>, M. Grodzicki<sup>2,3</sup>, P.J. Dereń<sup>1</sup>**

<sup>1</sup>*W. Trzebiatowski Institute of Low Temperature and Structural Research of the Polish Academy of Sciences, Wrocław, Poland*

<sup>2</sup>*Łukasiewicz Research Network – PORT Polish Center for Technology Development, Stabłowicka 147, Wrocław, Poland*

<sup>3</sup>*Institute of Experimental Physics, University of Wrocław, pl. M. Borna 9, Wrocław, Poland*

*\*corresponding author: D.Stefanska@intibs.pl*

Table S1. The calculated molar of precursors used in the syntheses.

| Sample (0.5 g)     | La(CH <sub>3</sub> COO) <sub>3</sub> | Mg(NO <sub>3</sub> ) <sub>2</sub> | Ti(C <sub>3</sub> H <sub>7</sub> O) <sub>4</sub> | NH <sub>4</sub> VO <sub>3</sub> | Cr(NO <sub>3</sub> ) <sub>3</sub> |
|--------------------|--------------------------------------|-----------------------------------|--------------------------------------------------|---------------------------------|-----------------------------------|
| LMT                | 2.24E-03                             | 1.23E-03                          | 1.1212E-03                                       | 0.00E+00                        | 0                                 |
| LMT:0.05V          | 2.24E-03                             | 1.23E-03                          | 1.1206E-03                                       | 5.61E-07                        | 0                                 |
| LMT:0.1V           | 2.24E-03                             | 1.23E-03                          | 1.1201E-03                                       | 1.12E-06                        | 0                                 |
| LMT:0.5V           | 2.24E-03                             | 1.23E-03                          | 1.1156E-03                                       | 5.61E-06                        | 0                                 |
| LMT:1V             | 2.24E-03                             | 1.23E-03                          | 1.1100E-03                                       | 1.12E-05                        | 0                                 |
| LMT:2V             | 2.24E-03                             | 1.23E-03                          | 1.0988E-03                                       | 2.24E-05                        | 0                                 |
| LMT:0.1Cr          | 2.24E-03                             | 1.23E-03                          | 1.1201E-03                                       | 0                               | 1.12E-06                          |
| LMT:0.1V,<br>0.1Cr | 2.24E-03                             | 1.23E-03                          | 1.1189E-03                                       | 1.12E-06                        | 1.12E-06                          |
| LMT:2V, 2Cr        | 2.24E-03                             | 1.23E-03                          | 1.0768E-03                                       | 2.24E-05                        | 2.24E-05                          |

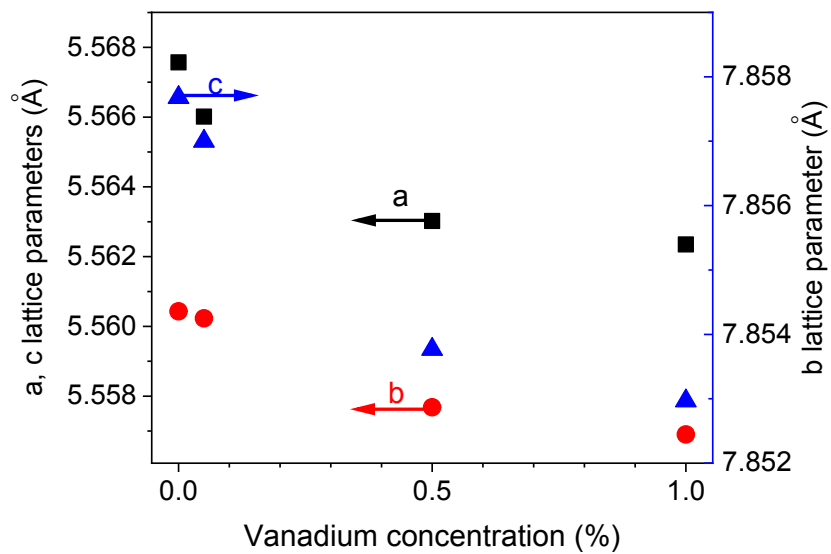

Fig. S1 Unit cell  $a$ ,  $b$ ,  $c$ , parameters of the  $\text{La}_2\text{MgTiO}_6$  in the function of vanadium concentration.

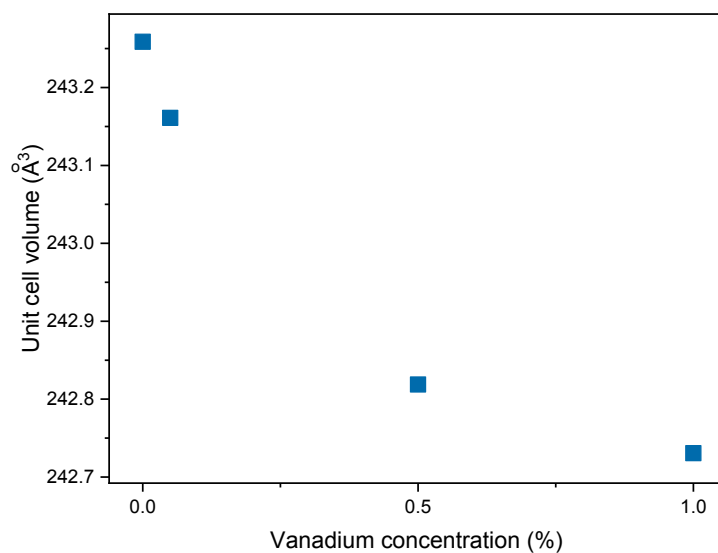

Fig. S2 Unit cell volume of the  $\text{La}_2\text{MgTiO}_6$  in the function of vanadium concentration.

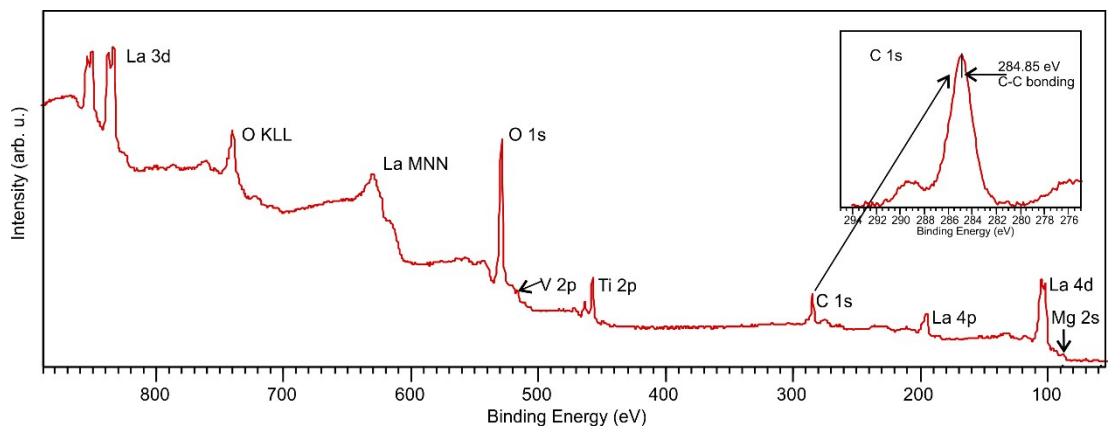

Fig. S3 Broad XPS spectrum for  $\text{La}_2\text{MgTiO}_6:\text{V}$  with core level lines of  $\text{La } 3d_{5/2}$ ,  $\text{O } 1s$ ,  $\text{Ti } 2p_{3/2}$ ,  $\text{Mg } 2s$ .

Table S2 Positions and full width at half maxima (FWHM) of main core level lines.

| State                               | Position (eV) | FWHM (eV) |
|-------------------------------------|---------------|-----------|
| $\text{La } 3d_{5/2}$               | 833.95        | 6.6       |
| $\text{O } 1s$                      | 529.35        | 2.75      |
| $\text{Ti } 2p_{3/2}$               | 458.05        | 1.85      |
| $\text{Mg } 2s$                     | 87.65         | 2.2       |
| $\text{V } 2p_{3/2} \text{ V(V)}$   | 516.7         | 1.7       |
| $\text{V } 2p_{3/2} \text{ V(III)}$ | 515.25        | 2.0       |

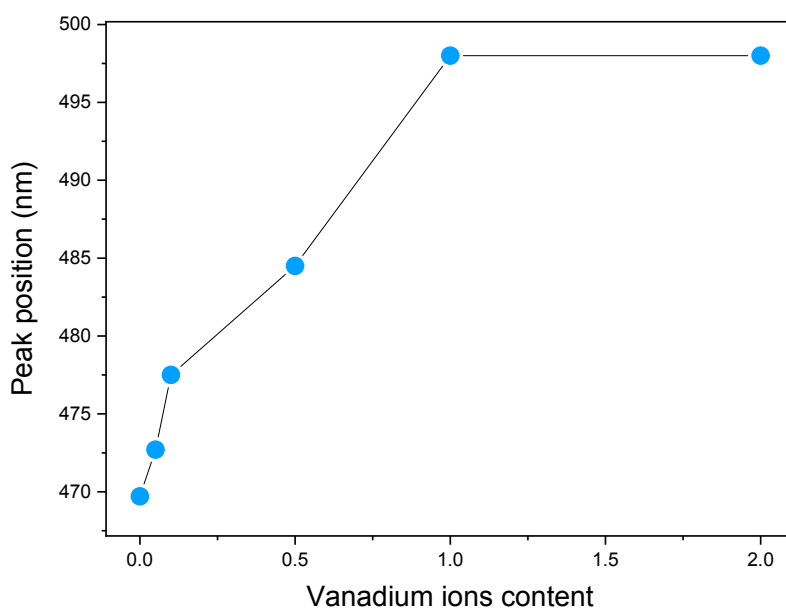

Fig. S4 Shift of maximum emission band with vanadium concentration.

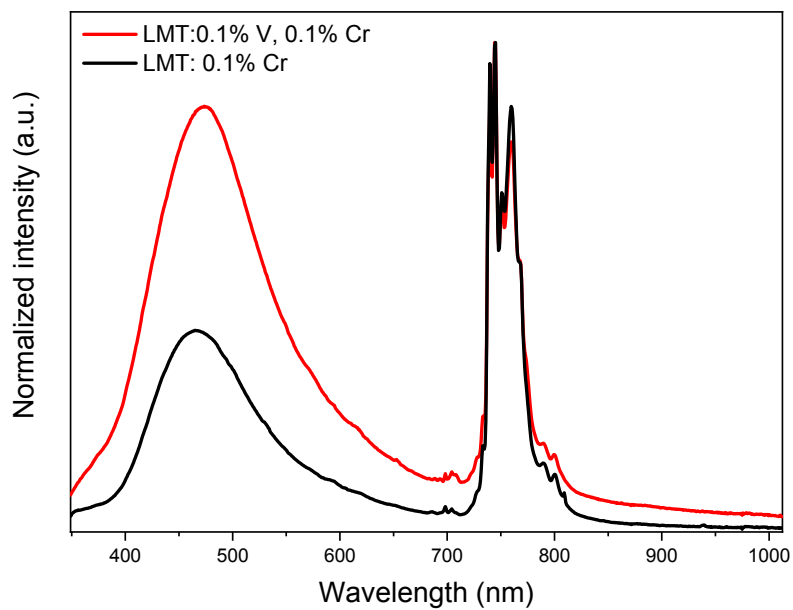

Fig. S5 Normalized emission spectra of  $\text{La}_2\text{MgTiO}_6:0.1\% \text{ V}, 0.1\% \text{ Cr}$  and  $\text{La}_2\text{MgTiO}_6:0.1\% \text{ Cr}$ .

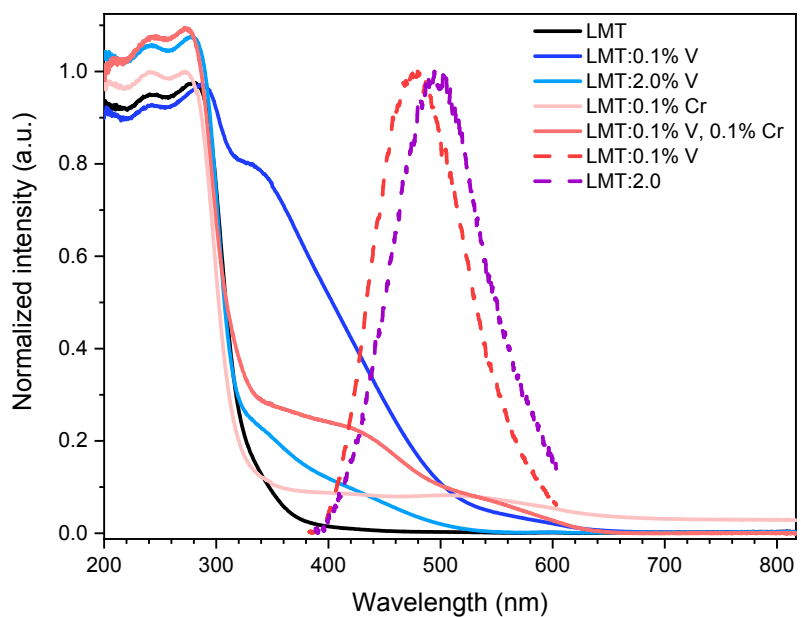

Fig. S6 Absorption (strait line) and emission (dashed line) of investigated samples.

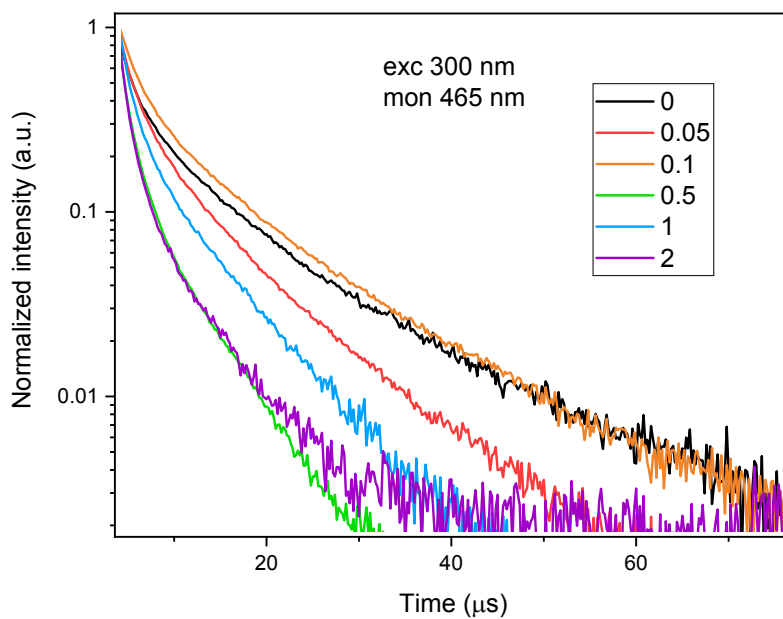

Fig. S7 Emission Decay curve of  $\text{La}_2\text{MgTiO}_6$  and samples doped with vanadium ions monitored at 465 nm.

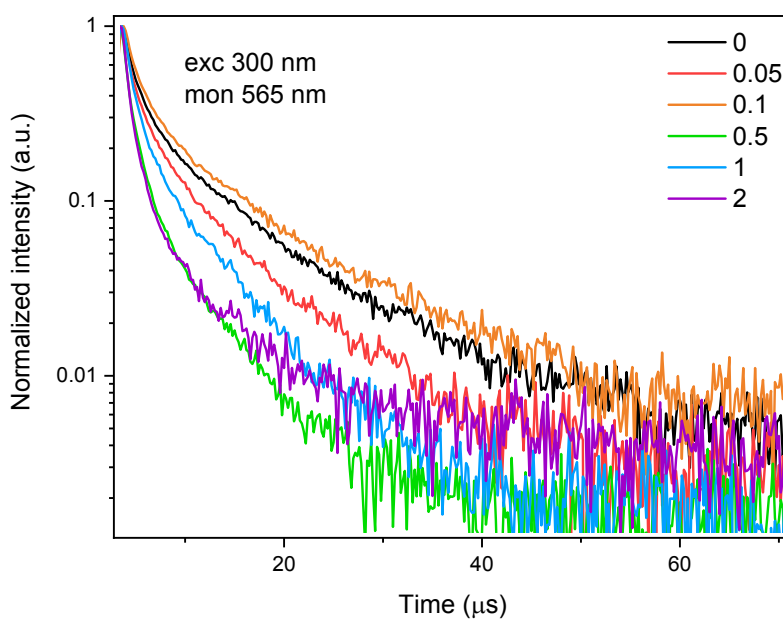

Fig. S8 Emission Decay curves of  $\text{La}_2\text{MgTiO}_6$  and samples doped with vanadium ions monitored at 565 nm.

Table S3 Emission decay times of investigated samples.

| LMT: xV     | mon 465 nm                 |                            | mon 565 nm                 |                            |
|-------------|----------------------------|----------------------------|----------------------------|----------------------------|
|             | $\tau_1$ [ $\mu\text{s}$ ] | $\tau_2$ [ $\mu\text{s}$ ] | $\tau_1$ [ $\mu\text{s}$ ] | $\tau_2$ [ $\mu\text{s}$ ] |
| <b>0</b>    | 1.78                       | 10.93                      | -                          | -                          |
| <b>0.05</b> | 1.57                       | 8.33                       | 0.98                       | 5.95                       |

|            |      |       |      |      |
|------------|------|-------|------|------|
| <b>0.1</b> | 2.02 | 11.13 | 1.27 | 8.51 |
| <b>0.5</b> | 0.91 | 4.75  | 0.66 | 3.53 |
| <b>1.0</b> | 1.13 | 6.55  | 0.87 | 5.37 |
| <b>2.0</b> | 0.83 | 4.23  | 0.63 | 3.61 |

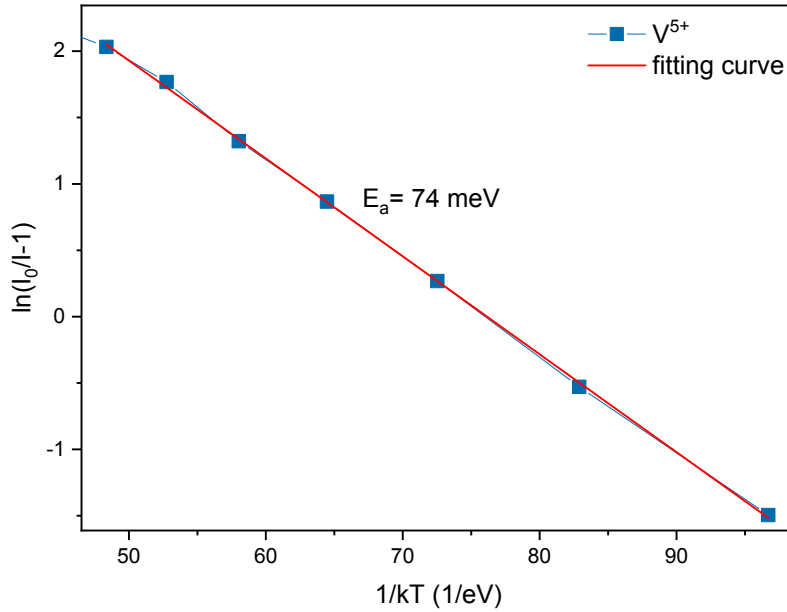

Fig. S9 Activation energies ( $E_a$ ) for thermal quenching of  $V^{5+}$  emission in  $La_2MgTiO_6$ , calculated from a function of  $\ln(I_0/I-1)$  versus  $1/kT$ .

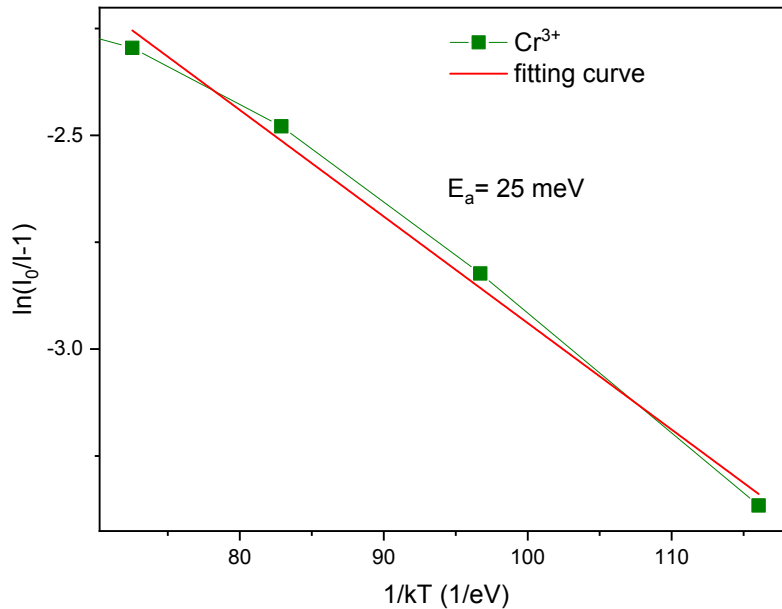

Fig. S10 Activation energies ( $E_a$ ) for thermal quenching of  $Cr^{3+}$  emission in  $La_2MgTiO_6$ , calculated from a function of  $\ln(I_0/I-1)$  versus  $1/kT$ .

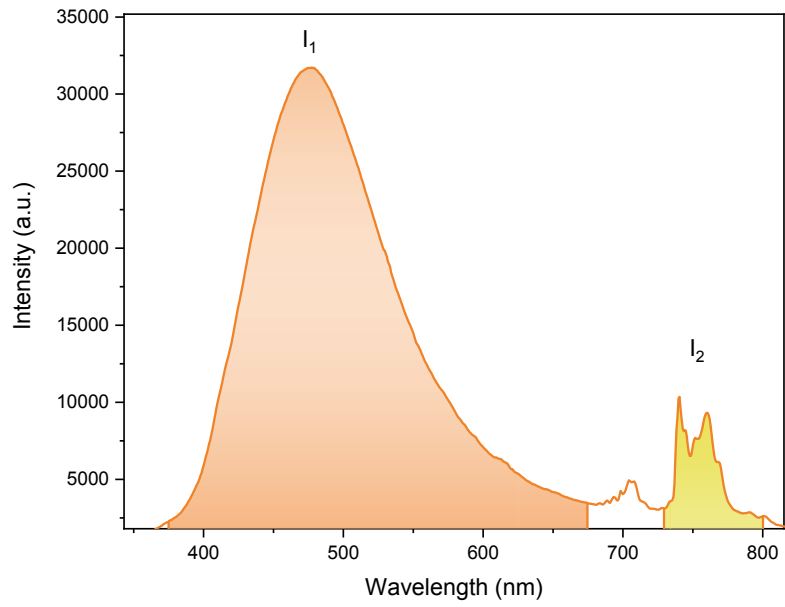

Fig. S11 Integration areas of representative sample  $\text{La}_2\text{MgTiO}_6$ : 0.1% V.

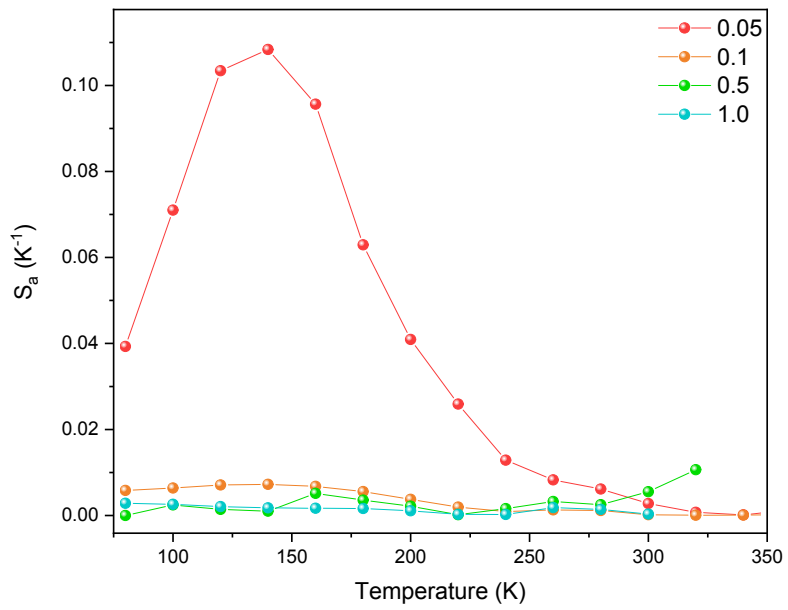

Fig. S12 Absolute sensitivity of  $\text{La}_2\text{MgTiO}_6$ :x% V.

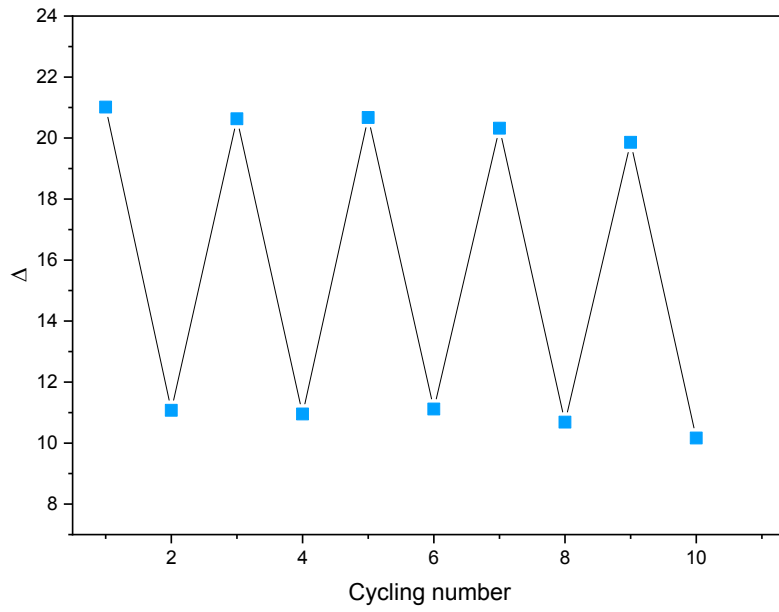

Fig. S13 Repeatability of  $\Delta$  temperature parameter of  $I_1/I_2$  emission evaluated at 80 K and 150 K during 10 heating/cooling cycles.
